# Supplementary material for: Electrochemical promotion of copper nanoparticles for the reverse water gas shift reaction
Source: Royal Society of Chemistry journal article supplement (doi:10.1039/d1cy02315b), 2022-01-01
Supplement: d1cy02315b1.pdf [file d1cy02315b1.pdf]

## Electronic Supplementary Information

### Electrochemical Promotion of Copper Nanoparticles for the Reverse Water Gas Shift Reaction

Ju Wang,<sup>a</sup> Martin Couillard<sup>b</sup> and Elena A. Baranova<sup>a,\*</sup>

<sup>a</sup> Department of Chemical and Biological Engineering, Centre for Catalysis Research and Innovation (CCRI),  
University of Ottawa, 161 Louis-Pasteur, Ottawa ON, K1N 6N5, Canada

<sup>b</sup> National Research Council of Canada, 1200 Montreal Road, Ottawa, Ontario K1A 0R6, Canada

\* Corresponding author: tel: 16135625800 (x 6302); fax: 16135625172; e-mail: elena.baranova@uottawa.ca (Elena A. Baranova)

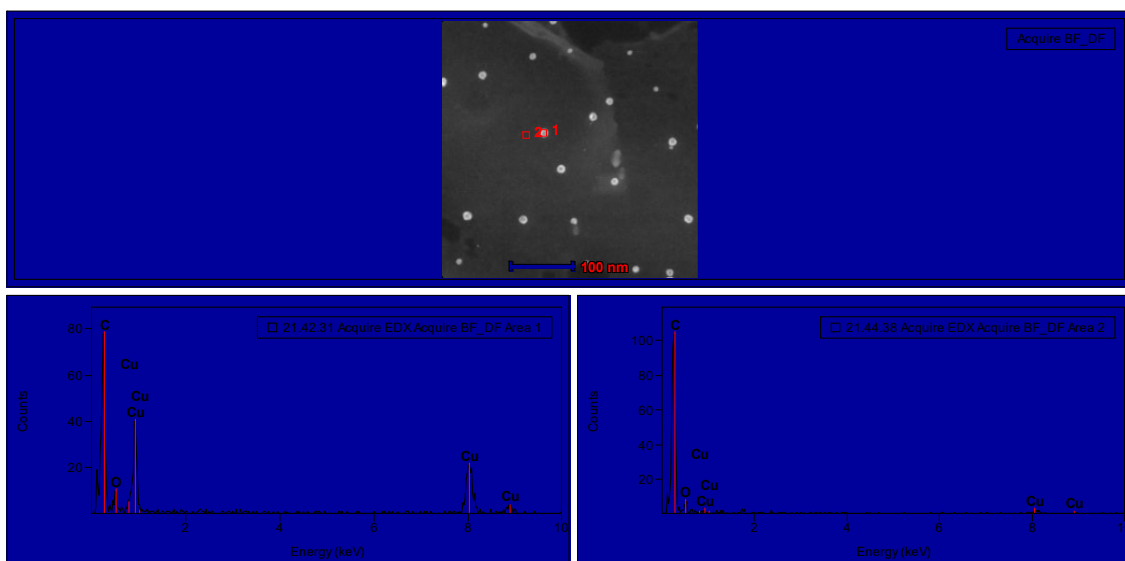

Figure S1 EDX spectrum of fresh Cu catalyst.

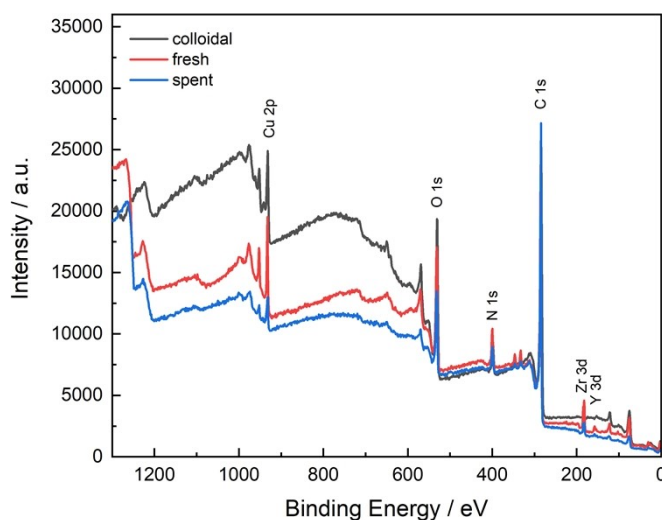

Figure S2 Wide scan of XPS spectrum for colloidal, fresh, and spent samples.

Table S1 XPS data of Cu 2p and C 1s for the colloidal, fresh, and spent samples.

|      |                     | Position (eV) |        |        | FWHM      |       |       | %Area     |       |       |
|------|---------------------|---------------|--------|--------|-----------|-------|-------|-----------|-------|-------|
|      |                     | colloidal     | fresh  | spent  | colloidal | fresh | spent | colloidal | fresh | spent |
| Cu2p | Cu(0)               | 932.68        | 932.61 | 932.58 | 0.94      | 1.10  | 1.10  | 5.07      | 8.06  | 11.96 |
|      | Cu(I)<br>Oxide      | 932.17        | 932.16 | 932.18 | 1.09      | 1.01  | 0.97  | 34.51     | 74.15 | 41.89 |
|      | Cu(II)<br>Oxide     | 933.30        | 933.30 | 933.06 | 2.08      | 2.06  | 2.06  | 55.65     | 7.06  | 36.14 |
|      | Cu(II)<br>Hydroxide | 934.72        | 934.62 | 934.62 | 2.84      | 2.84  | 2.84  | 4.77      | 10.73 | 10.01 |
| C1s  | C-C, C-H            | 284.83        | 284.80 | 284.80 | 1.40      | 1.20  | 1.15  | 67.44     | 77.90 | 84.60 |
|      | C-OH,<br>C-O-C      | 286.62        | 286.62 | 286.63 | 1.60      | 1.57  | 1.17  | 21.05     | 15.51 | 8.95  |
|      | C=O                 | 288.07        | 288.10 | 287.80 | 1.60      | 1.57  | 1.17  | 1.29      | 1.33  | 1.25  |
|      | O-C=O               | 288.73        | 288.82 | 288.93 | 1.60      | 1.60  | 1.50  | 5.62      | 4.06  | 3.98  |
|      | Carbonate           | 290.57        | 290.74 | 290.63 | 1.31      | 1.31  | 1.31  | 1.30      | 1.21  | 1.22  |
|      | Carbide             | 283.10        |        |        | 1.60      |       |       | 3.31      |       |       |

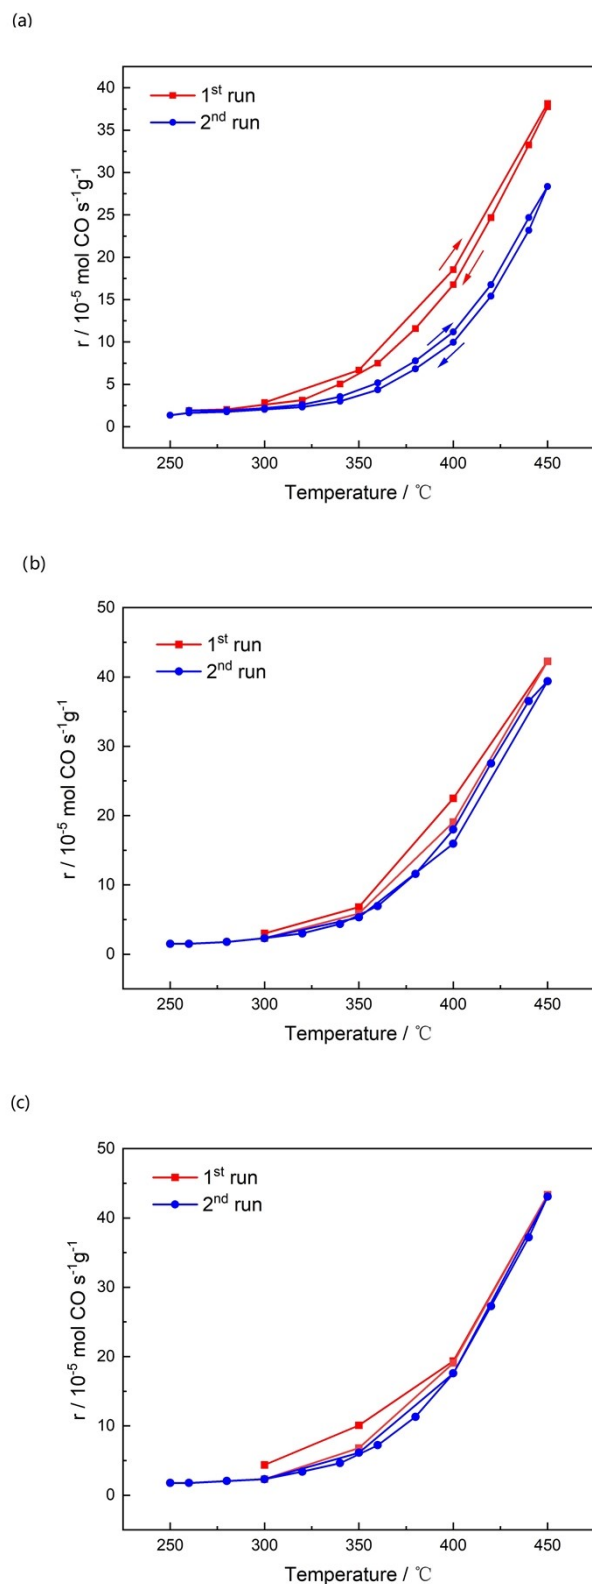

Figure S3 Overall catalytic open-circuit CO production rate of Cu/YSZ under (a)  $\text{CO}_2:\text{H}_2$  ratio of 1:1 (b)  $\text{CO}_2:\text{H}_2$  ratio of 3:1 and (c)  $\text{CO}_2:\text{H}_2$  ratio of 1:6.

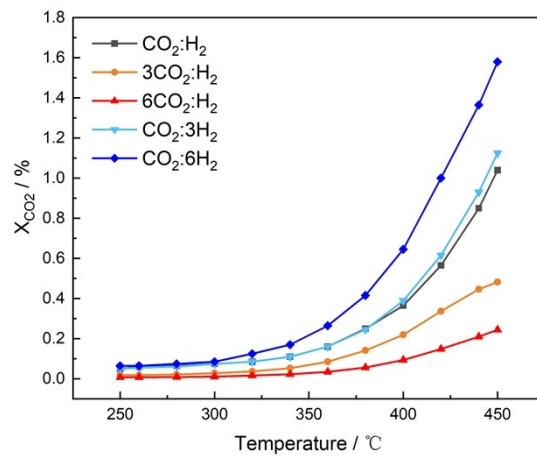

Figure S4 Open-circuit CO<sub>2</sub> conversion rate of Cu/YSZ under different CO<sub>2</sub>:H<sub>2</sub> ratios.

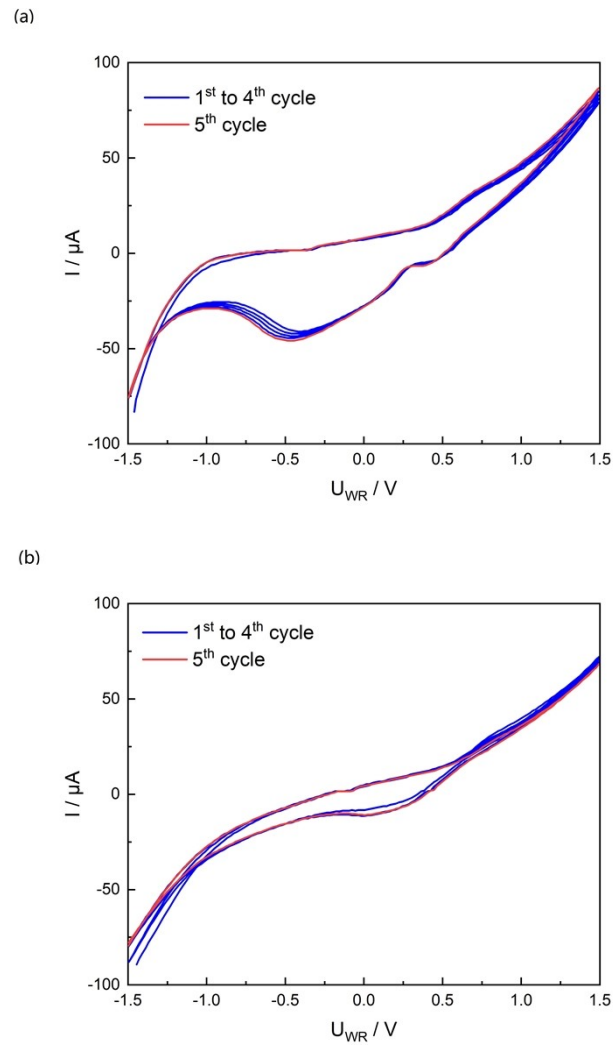

Figure S5 Overall CV cycles of Cu/YSZ at 400°C under (a) Argon and (b) CO<sub>2</sub>:H<sub>2</sub> ratio of 1:1.

Table S2 Summary of  $N_G$  and  $\rho$  under stoichiometric condition at various temperatures.

| Temperature (°C) | $N_G$ (mol O uptake)   | $\rho$ |
|------------------|------------------------|--------|
| 340°C            | $2.987 \times 10^{-8}$ | 1.08   |
| 360°C            | $3.813 \times 10^{-8}$ | 1.16   |
| 400°C            | $1.01 \times 10^{-7}$  | 1.19   |
| 440°C            | $1.919 \times 10^{-7}$ | 1.14   |
| 450°C            | $1.73 \times 10^{-7}$  | 1.11   |

Table S3 Summary of  $N_G$  and  $\rho$  at 400°C under various CO<sub>2</sub>:H<sub>2</sub> ratios.

| CO <sub>2</sub> :H <sub>2</sub> ratio | $N_G$ (mol O uptake)   | $\rho$ |
|---------------------------------------|------------------------|--------|
| 1CO <sub>2</sub> :1H <sub>2</sub>     | $1.01 \times 10^{-7}$  | 1.19   |
| 3CO <sub>2</sub> :1H <sub>2</sub>     | $9.311 \times 10^{-8}$ | 1.17   |
| 6CO <sub>2</sub> :1H <sub>2</sub>     | $7.017 \times 10^{-8}$ | 1.14   |
| CO <sub>2</sub> :3H <sub>2</sub>      | $6.934 \times 10^{-8}$ | 1.11   |
| CO <sub>2</sub> :6H <sub>2</sub>      | $6.846 \times 10^{-8}$ | 1.07   |

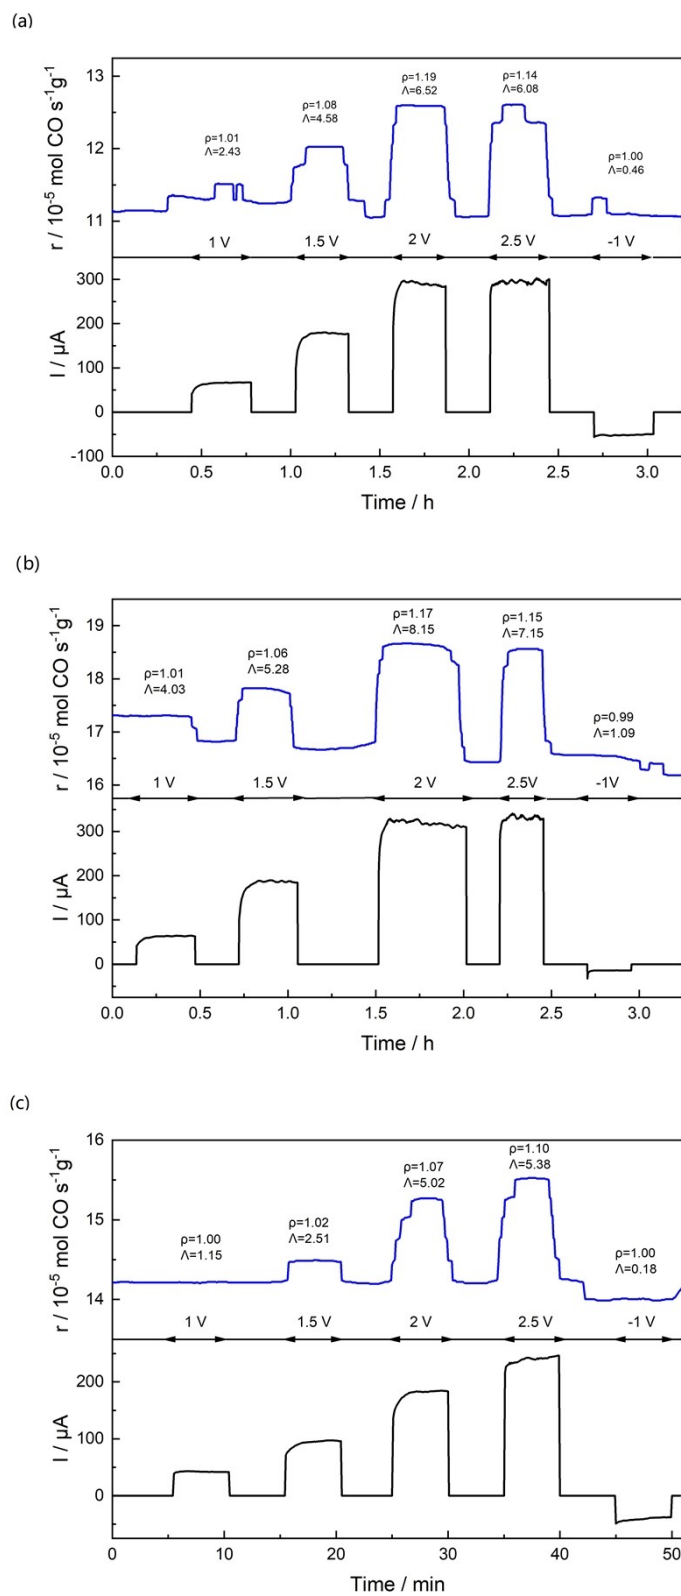

Figure S6 Transient response of CO rate under various applied potential 1, 1.5, 2, 2.5, -1V at 400°C under (a)  $\text{CO}_2:\text{H}_2$  ratio of 1:1 (b)  $\text{CO}_2:\text{H}_2$  ratio of 3:1 and (c)  $\text{CO}_2:\text{H}_2$  ratio of 1:6.
